# Supplementary material for: Multiple CH/π Interactions Maintain the Binding of Aflatoxin B1 in the Active Cavity of Human Cytochrome P450 1A2
Source: PubMed Central journal article supplement (PMC6468651; doi:10.3390/toxins11030158), 2019-03-12
Supplement: toxins-11-00158-s001.pdf [file toxins-11-00158-s001.pdf]

# Supplementary Materials: Multiple CH/ $\pi$ Interactions Maintain the Binding of Aflatoxin B<sub>1</sub> in Active Cavity of Human Cytochrome P450 1A2

Jun Wu †, Sisi Zhu †, Yunbo Wu, Tianqing Jiang, Lingling Wang, Jun Jiang, Jikai Wen and Yiqun Deng \*

**Table S1.** The docking score of CYP1A2 and the mutants.

| Samples | GB/VI Score (kcal/mol) |
|---------|------------------------|
| WT      | -8.98                  |
| T124A   | -8.37                  |
| F125A   | -8.58                  |
| F226A   | -8.09                  |
| F260A   | -8.81                  |

**Table S2.** Contents of secondary structure elements of CYP1A2 and its mutants. CD spectra were analyzed by CONTINLL [1].

| Samples | $\alpha$ -Helix | $\beta$ -Sheet | Turns | Unordered |
|---------|-----------------|----------------|-------|-----------|
|         |                 | %              |       |           |
| WT      | 51              | 9.1            | 16.1  | 23.8      |
| T124A   | 60.4            | 5.8            | 14.4  | 19.4      |
| F226A   | 61.1            | 5.8            | 15.2  | 17.9      |
| F260A   | 47.8            | 11.3           | 17    | 23.9      |

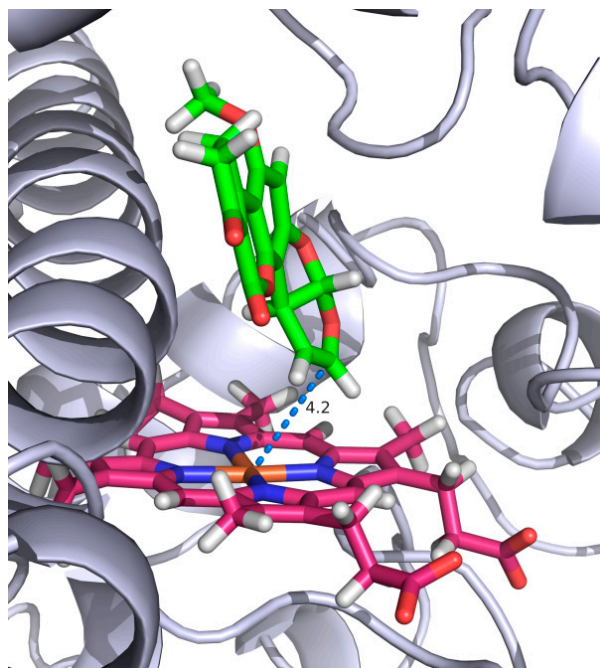

**Figure S1.** The side view of AFB1 conformation in the substrate pocket of CYP1A2.

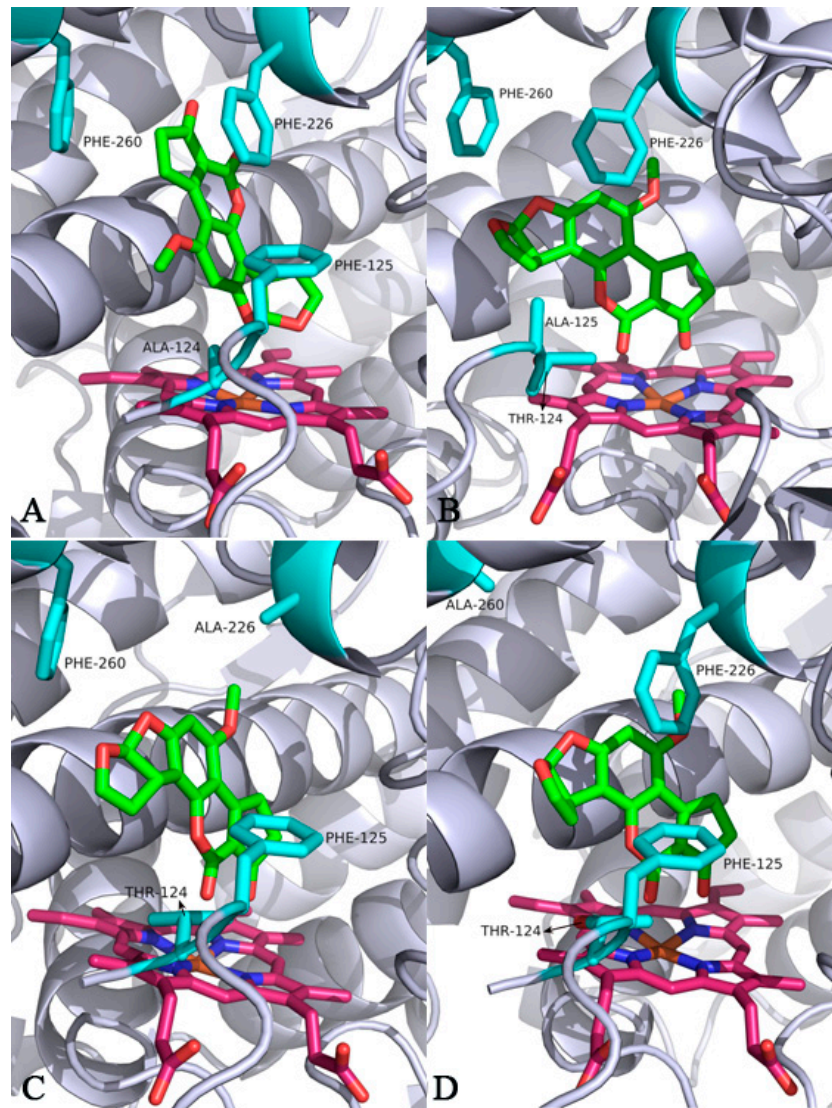

**Figure S2.** The docking models of AFB1 into CYP1A2 mutants. The docking conformation of AFB1 in T124A (A), F125A (B), F226A (C), and F260A (D).

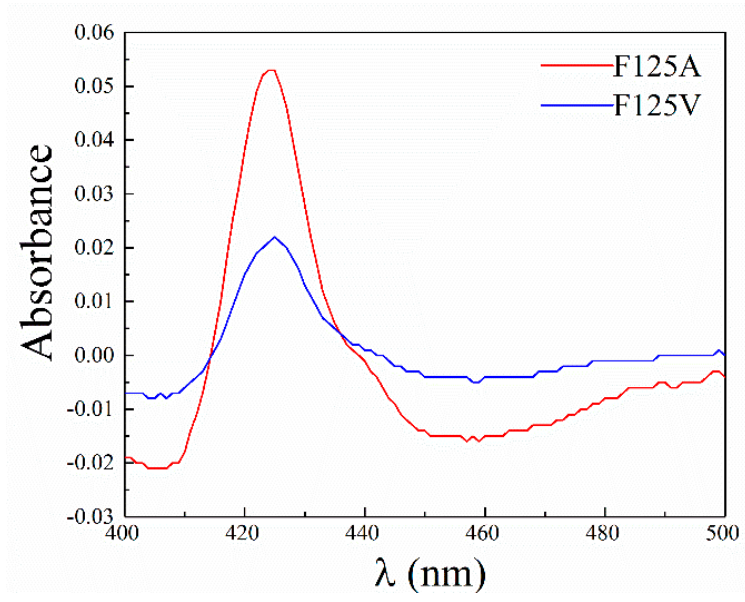

Figure S3. The  $\text{Fe}^{2+}\cdot\text{CO}$  vs.  $\text{Fe}^{2+}$  difference spectra of F125A and F125V.

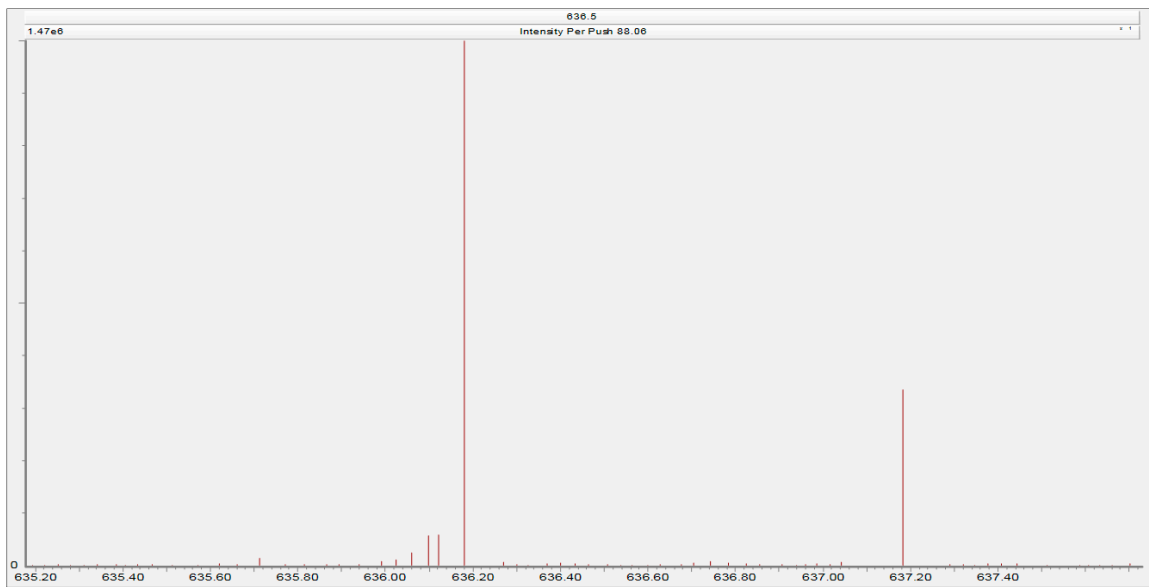

Figure S4. The parent ion of AFBO-GSH with  $m/z$  636.

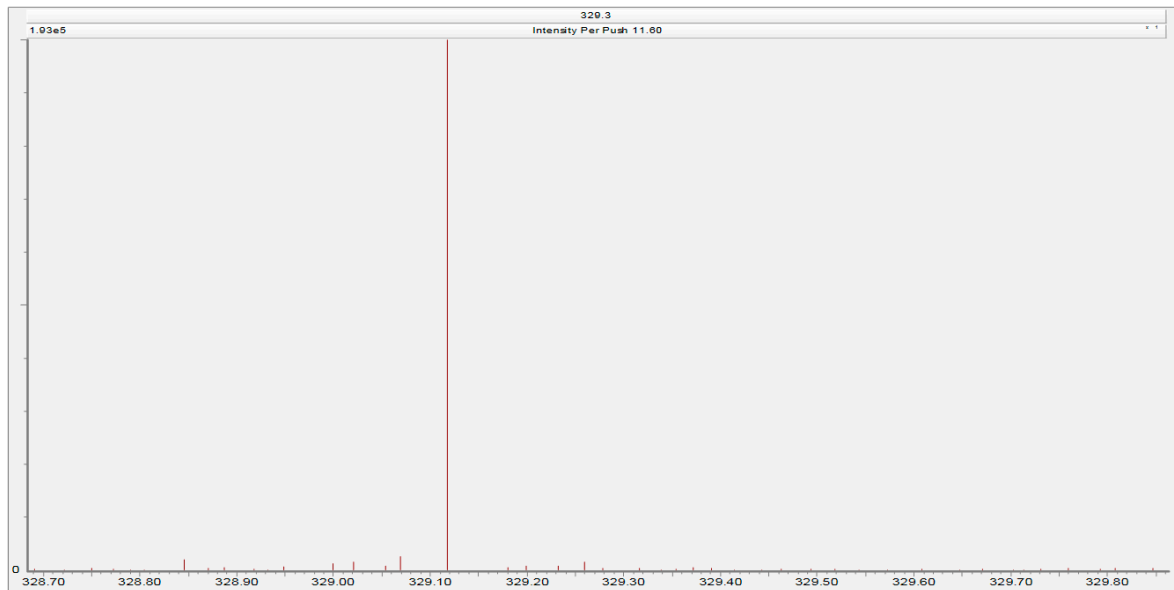

Figure S5. The AFB1 fragment ion with  $m/z$  329.

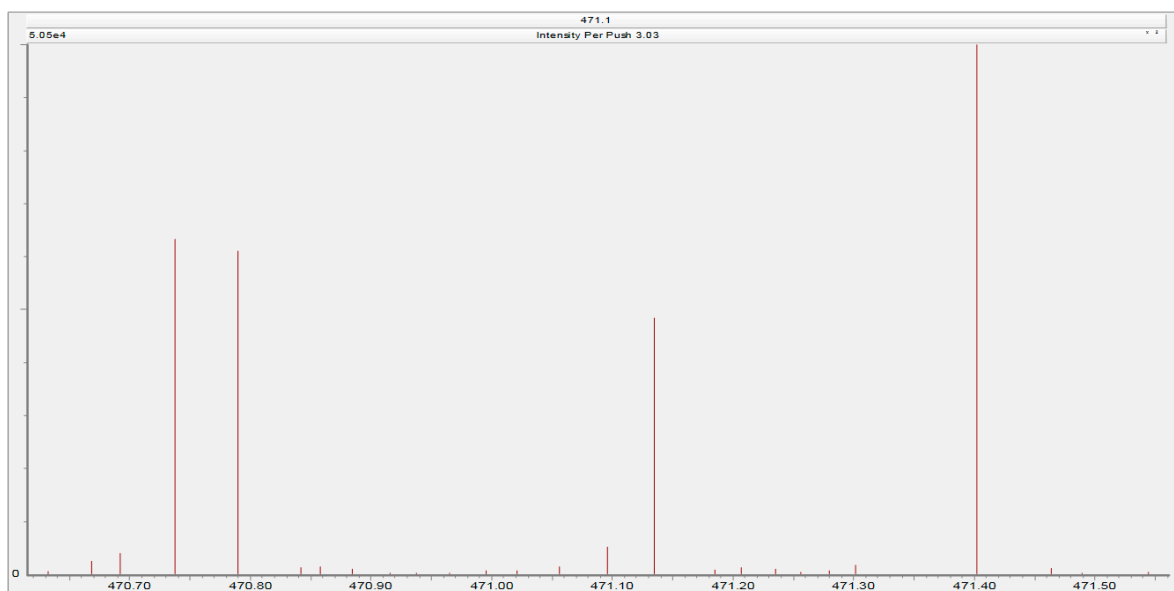

Figure S6. The fragment ion with  $m/z$  471.

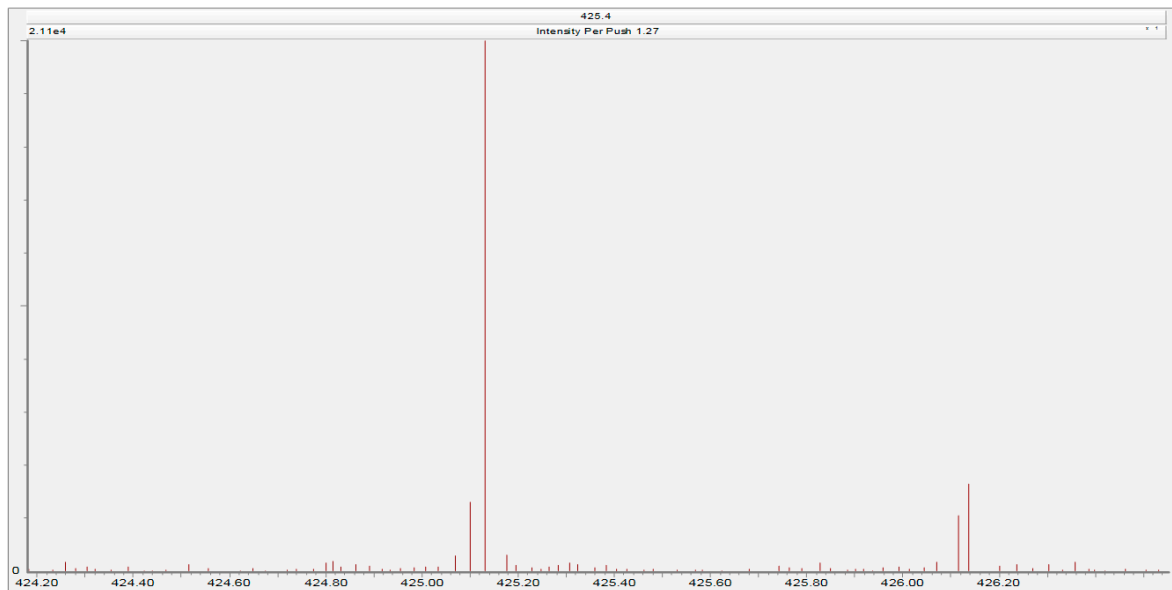

Figure S7. The fragment ion with  $m/z$  425.

## References

1. Sreerama, N.; Woody, R.W. Estimation of protein secondary structure from circular dichroism spectra: Comparison of contin, selcon, and cdsstr methods with an expanded reference set. *Anal. Biochem.* **2000**, *287*, 252–260.
